# Supplementary material
Source: Elsevier journal article supplement (https://www.sciencedirect.com/science/article/pii/S0211563819300276)
Supplement: mmc1 [file S0211563819300276:mmc1.docx]

**Tabla 1 online**

*Resultados de la calidad metodológica de los estudios según la escala PEDro*

| Estudios | Criterios | | | | | | | | | | | |
| --- | --- | --- | --- | --- | --- | --- | --- | --- | --- | --- | --- | --- |
| Autores / año | **Criterio 1** | **Criterio 2** | **Criterio 3** | **Criterio 4** | **Criterio 5** | **Criterio 6** | **Criterio 7** | **Criterio 8** | **Criterio 9** | **Criterio 10** | **Criterio 11** | **Puntuación PEDro** |
| Almeida y Bhatt12, 2012 | 1 | 1 | 1 | 1 | 0 | 0 | 1 | 1 | 1 | 1 | 1 | 9 |
| Chaiwanichsiri et al.13, 2011 | 1 | 1 | 1 | 1 | 1 | 0 | 1 | 1 | 1 | 1 | 1 | 10 |
| Harro et al.14, 2014 | 1 | 1 | 1 | 1 | 1 | 0 | 1 | 1 | 1 | 1 | 1 | 10 |
| Kadivar et al.15, 2011 | 1 | 1 | 1 | 1 | 1 | 0 | 0 | 1 | 1 | 1 | 1 | 9 |
| Schlick et al.16, 2015 | 1 | 1 | 1 | 1 | 0 | 0 | 0 | 1 | 1 | 1 | 1 | 8 |
| Seco et al.17, 2011 | 1 | 1 | 1 | 1 | 0 | 0 | 1 | 1 | 1 | 1 | 1 | 9 |
| Shen y Mak18, 2012 | 1 | 1 | 1 | 1 | 0 | 0 | 1 | 1 | 1 | 1 | 1 | 9 |
| Song et al.19, 2015 | 1 | 1 | 1 | 1 | 0 | 0 | 0 | 1 | 1 | 1 | 1 | 8 |

**Criterios: 1.** Criterios de elección, **2**. Aleatorización, **3**. Asignación oculta, **4.** Grupos similares al inicio, **5**. Sujetos cegados, **6**. Terapeutas cegados, **7**. Evaluadores cegados, **8**. Seguimiento adecuado, **9**. Intención de tratar, **10**. Comparación estadística, **11**. Estimación puntual y variabilidad.

Si=1; No=0
